# Supplementary material for: 7S,15R-Dihydroxy-16S,17S-Epoxy-Docosapentaenoic Acid, a Novel DHA Epoxy Derivative, Inhibits Colorectal Cancer Stemness through Repolarization of Tumor-Associated Macrophage Functions and the ROS/STAT3 Signaling Pathway
Source: MDPI journal article supplement (doi:10.3390/antiox10091459), 2021-09-14
Supplement: s1 [file s1]

**Table S1.** Specific primers for RT-qPCR analysis of human target and control ( $\beta$ -actin) genes

| Genes          | Accession      | Primers                                                                                       |
|----------------|----------------|-----------------------------------------------------------------------------------------------|
|                | Number         |                                                                                               |
| CD209          | NM_001144895.2 | Forward: 5'-CCA GGA TGG TCT CGA TCT CT-3'<br>Reverse: 5'-CCA GGA TGG TCT CGA TCT CT-3'        |
| CD163          | NM_203416.4    | Forward: 5'-CGTTCACTCTCAAGTCATCTGCG-3'<br>Reverse: 5'-TAA GCT GGC AAA GAA CA-3'               |
| CD206          | NM_001009567.1 | Forward: 5'-ACCTCACAAGTATCCACACCATC -3'<br>Reverse: 5'-CTTTCATCACCACACAATCCTC -3'             |
| MMP2           | NM_001144893.2 | Forward: 5'-ACC GCG ACA AGA AGT ATG GC-3'<br>Reverse: 5'-CCA CTT GCG GTC ATC GT-3'            |
| MMP9           | NM_004994.3    | Forward: 5'-CGA TGA CGA GTT GTG GTC CC-3'<br>Reverse: 5'-TCG TAG TTG GCC GTG GTA CT3'         |
| Trem2          | NM_018965.4    | Forward: 5'-TTG CCC CTA TGA CTC CAT GA -3'<br>Reverse: 5'-CGC AGC GTA ATG GTG AGA GT -3'      |
| VEGF           | NM_001025366.3 | Forward: 5'-ATG GCA GAA GGA GGG CA-3'<br>Reverse: 5'-ATC GCA TCA GGG GCA CAC AG-3'            |
| E-cadherin     | NM_004360.5    | Forward: 5'-GCC TCC TGA AAA GAG AGT GGA AG-3'<br>Reverse: 5'-TGG CAG TGT CTC TCC AAA TCC G-3' |
| N-cadherin     | NM_001792.5    | Forward: 5'-CCTCCAGAGTTTACTGCCATGAC-3'<br>Reverse: 5'-GTAGGATCTCCGCCACTGATTG-3'               |
| Vimentin       | NM_003380.5    | Forward: 5'-AGGCAAAGCAGGAGTCCACTGA-3'<br>Reverse: 5'-ATCTGGCGTTCCAGGGACTCAT-3'                |
| $\beta$ -actin | NM_001100.4    | Forward: 5'-TGTTACCAACCTGGGACGACA-3'<br>Reverse: 5'-GGGGTGTGTAAGGTCTCAAA-3'                   |
